# Supplementary material for: Exploring the Impacts of Genotype-Management-Environment Interactions on Wheat Productivity, Water Use Efficiency, and Nitrogen Use Efficiency under Rainfed Conditions
Source: MDPI journal article supplement (doi:10.3390/plants10112310), 2021-10-27
Supplement: s1 [file s1]

**Supplementary Table S1.** Trend analysis of pooled data of two growing seasons for the effect of N application rates on agronomic traits†, water use efficiency, and N traits‡ of three cultivars.

| Cultivars | Trend analysis | mL AI | Grain number | 1000 grain weight<br>g | Grain yield<br>t ha <sup>-1</sup> | Aboveground biomass<br>t ha <sup>-1</sup> | Harvest index | Crop N-uptake<br>kg ha <sup>-1</sup> | WUE‡<br>kg ha <sup>-1</sup> mm <sup>-1</sup> | NUE<br>kg ha <sup>-1</sup> kg <sup>-1</sup> N | NUtE<br>kg ha <sup>-1</sup> kg <sup>-1</sup> N | NUpE<br>kg ha <sup>-1</sup> kg <sup>-1</sup> N |
|-----------|----------------|-------|--------------|------------------------|-----------------------------------|-------------------------------------------|---------------|--------------------------------------|----------------------------------------------|-----------------------------------------------|------------------------------------------------|------------------------------------------------|
| AUR-809   | Linear         | ***   | ***          | ***                    | ***                               | ***                                       | ns            | ***                                  | ***                                          | ***                                           | ***                                            | ***                                            |
|           | Quadratic      | ***   | **           | **                     | **                                | **                                        | *             | **                                   | **                                           | ns                                            | ns                                             | *                                              |
|           | Cubic          | ns    | ns           | ns                     | ns                                | ns                                        | ns            | ns                                   | ns                                           | ns                                            | ns                                             | ns                                             |
| CHK-50    | Linear         | ***   | ***          | ***                    | ***                               | ***                                       | ns            | ***                                  | ***                                          | ***                                           | ***                                            | ***                                            |
|           | Quadratic      | ***   | **           | **                     | **                                | ***                                       | ns            | **                                   | **                                           | ns                                            | *                                              | *                                              |
|           | Cubic          | *     | ns           | ns                     | ns                                | ns                                        | ns            | ns                                   | ns                                           | ns                                            | ns                                             | ns                                             |
| FSD-2008  | Linear         | ***   | ***          | ***                    | ***                               | ***                                       | *             | ***                                  | ***                                          | ***                                           | ***                                            | ***                                            |
|           | Quadratic      | ***   | ***          | ***                    | **                                | ***                                       | *             | ***                                  | ***                                          | ns                                            | *                                              | **                                             |
|           | Cubic          | ns    | ns           | ns                     | ns                                | ns                                        | ns            | ns                                   | ns                                           | ns                                            | ns                                             | ns                                             |

† mLAI, grain number, 1000 grain weight, grain yield, biomass, harvest index, and crop N-uptake.

‡ WUE, water use efficiency

§ NUE, nitrogen use efficiency, NUtE, nitrogen utilization efficiency, NUpE, nitrogen uptake efficiency.

\* p < 0.05, \*\* p < 0.01, \*\*\* p < 0.001.

**Supplementary Table S2.** The correlation of wheat grain yield with agronomic traits, water use efficiency (WUE), nitrogen use efficiency (NUE), nitrogen utilization efficiency (NUEt) and nitrogen uptake efficiency (NUpE) under favorable and unfavorable growing conditions.

|             |                            | mLAI    | Grain<br>number | 1000<br>grain<br>weight | Aboveground<br>biomass | Harvest<br>index | Crop N-<br>uptake | WUE     | NUE    | NUEt    | NUpE  |
|-------------|----------------------------|---------|-----------------|-------------------------|------------------------|------------------|-------------------|---------|--------|---------|-------|
| Grain yield | Favorable growing season   | 0.97*** | 0.99***         | 0.93***                 | 0.99***                | 0.8***           | 0.96***           | 1***    | 0.69** | -0.69** | -0.42 |
|             | Unfavorable growing season | 1***    | 0.93***         | 0.85***                 | 0.98***                | 0.33             | 0.97***           | 0.99*** | -0.63* | 0.84*** | -0.05 |

\* p < 0.05, \*\* p < 0.01, \*\*\* p < 0.001.
